# Supplementary material for: Epidemiology and factors associated with peripheral neuropathy among HIV infected patients in Gondar, Ethiopia: A cross-sectional study
Source: PubMed Central journal article supplement (PMC6350981; doi:10.1371/journal.pone.0211354), 2019-01-29
Supplement: pone.0211354.s001.pdf [file pone.0211354.s001.pdf]

## Supporting file: Sample representativeness

**Table 1 Socio-demographic characteristics of the population (N 2152) of the research setting and sample (n 359) patients living with HIV [PLHIV] for adults aged 18 and above years, North West Ethiopia, 2017**

| Variable                   |                  | Sample total      | Population  |             | E(np)    | Population<br>95% CI |
|----------------------------|------------------|-------------------|-------------|-------------|----------|----------------------|
|                            |                  | n (%)             | N           | %           |          |                      |
| <b>All participants</b>    |                  | <b>359 (100%)</b> | <b>2152</b> | <b>100%</b> | <b>N</b> |                      |
| <b>Sex</b>                 | Male             | 125 (34.8)        | 782         | 36.3        | 130.5    | 34.2, 38.5           |
|                            | Female           | 234 (65.2)        | 1,370       | 63.7        | 228.5    | 63.0, 67.4           |
| <b>Age in years, mean</b>  |                  | 36.5              | 36.84       |             |          | 35.4, 37.5           |
| <b>Age group (years)</b>   | < 30             | 74 (20.6)         | 396         | 18.4        | 66.1     | 16.7, 21.0           |
|                            | 30-39            | 177 (49.3)        | 1105        | 51.3        | 184.3    | 50.4, 54.7           |
|                            | 40-49            | 68 (18.9)         | 390         | 18.1        | 65.1     | 16.4, 20.7           |
|                            | 50-59            | 32 (8.9)          | 221         | 10.3        | 36.9     | 8.3, 12.7            |
|                            | ≥60              | 8 (2.2)           | 40          | 1.9         | 6.7      | -0.3, 4.1            |
| <b>Residence</b>           | Urban            | 340 (94.5)        | 1959        | 91.0        | 326.8    | 91.0, 95.4           |
|                            | Rural            | 19 (5.29)         | 193         | 9.0         | 32.2     | 7.0, 11.4            |
| <b>Marital status</b>      | Married          | 145 (40.4)        | 828         | 38.5        | 138.1    | 37.2, 41.6           |
|                            | Single           | 45 (12.5)         | 261         | 12.1        | 43.5     | 10.2, 14.6           |
|                            | Divorced         | 85 (23.7)         | 522         | 24.3        | 87.1     | 22.7, 27.0           |
|                            | Windowed         | 71 (19.8)         | 471         | 21.9        | 78.6     | 20.2, 24.6           |
|                            | Separated        | 13 (3.6)          | 70          | 3.3         | 11.7     | 1.2, 5.5             |
| <b>Level of Education</b>  | Uneducated       | 92 (25.6)         | 569         | 26.4        | 94.9     | 24.9, 29.2           |
|                            | Grade 1-6        | 70 (19.5)         | 451         | 21.0        | 75.2     | 19.3, 23.6           |
|                            | Grade 7-8        | 43 (12)           | 247         | 11.5        | 41.2     | 9.6, 13.9            |
|                            | Grade 9-10       | 59 (16.4)         | 340         | 15.8        | 56.7     | 14.0, 18.4           |
|                            | Grade 11-12      | 43 (12)           | 277         | 12.9        | 46.2     | 11.0, 15.4           |
|                            | College & above  | 52 (14.5)         | 268         | 12.5        | 44.7     | 10.6, 14.9           |
| <b>Occupational status</b> | Governmental     | 68 (18.9)         | 410         | 19.1        | 68.4     | 17.3, 21.7           |
|                            | Private employee | 53 (14.8)         | 298         | 13.8        | 49.7     | 12.0, 16.4           |
|                            | Daily labourer   | 48 (13.5)         | 304         | 14.1        | 50.7     | 12.3, 16.6           |
|                            | House wife       | 66 (18.4)         | 382         | 17.8        | 63.7     | 16.0, 20.4           |

|                          |            |            |      |      |       |            |
|--------------------------|------------|------------|------|------|-------|------------|
|                          | Unemployed | 49 (13.6)  | 328  | 15.2 | 54.7  | 13.4, 17.8 |
|                          | Farmer     | 17 (4.7)   | 89   | 4.1  | 14.8  | 2.1, 6.4   |
|                          | Other      | 59 (16.4)  | 341  | 15.8 | 56.9  | 14.0, 18.4 |
| <b>Religion</b>          | Orthodox   | 314 (87.5) | 1908 | 88.7 | 318.3 | 88.6, 93.0 |
|                          | Muslim     | 37 (10.4)  | 175  | 8.1  | 29.2  | 6.1, 10.5  |
|                          | Protestant | 8 (2.2)    | 46   | 2.1  | 7.7   | 0.1, 4.4   |
|                          | Others     | 1 (0.3)    | 23   | 1.1  | 3.8   | -1.1, 3.3  |
| <b>Alcoholic history</b> | Yes        | 23 (6.4)   | 149  | 6.9  | 24.9  | 4.9, 9.3   |
|                          | No         | 336 (93.6) | 2003 | 93.1 | 334.1 | 93.1, 9.5  |

**Formula proposed by Cochran E(np): Unbiased estimate of normal sample representation.**  
Cochran, W.G. (1977). *Sampling techniques*. (3rd ed.). New York, NY: Wiley.

**Table 2 Clinical characteristics of the population (N 2152) of the research setting and sample (n 359) patients living with HIV [PLHIV] for adults aged 18 and above years, North West Ethiopia, 2017**

| <b>Baseline CD4 cell count</b>      | <b>Sample total n (%)</b> | <b>Population N (%)</b> | <b>E(np)</b> | <b>Population N 95% CI</b> |
|-------------------------------------|---------------------------|-------------------------|--------------|----------------------------|
| > 200 cell/mm <sup>3</sup>          | 96 (26.7)                 | 632 (29.4)              | 105.4        | 27.2, 31.6                 |
| ≤ 200 cell/mm <sup>3</sup>          | 263 (73.3)                | 1520 (70.6)             | 253.6        | 68.4, 72.8                 |
| <b>Recent CD4 cell count</b>        |                           |                         |              |                            |
| > 350 cell/mm <sup>3</sup>          | 195 (54.3)                | 1194 (55.5)             | 199.2        | 53.3, 57.7                 |
| 200-350 cell/mm <sup>3</sup>        | 100 (27.9)                | 567 (26.3)              | 94.6         | 24.1, 28.5                 |
| ≤ 200 cell/mm <sup>3</sup>          | 61 (17)                   | 391 (18.2)              | 65.2         | 16.0, 20.4                 |
| <b>WHO disease stages</b>           |                           |                         |              |                            |
| Stage I and II                      | 326 (90.8)                | 1974 (91.7)             | 329.3        | 89.5, 93.9                 |
| Stage III and IV                    | 33 (9.19)                 | 178 (8.3)               | 29.7         | 6.1, 10.5                  |
| <b>History of anti TB treatment</b> |                           |                         |              |                            |
| Yes                                 | 160 (44.6)                | 991 (46.1)              | 165.3        | 43.9, 48.3                 |
| No                                  | 199 (55.4)                | 1161 (53.9)             | 193.7        | 51.7, 56.1                 |
| <b>Type of HAART regimen</b>        |                           |                         |              |                            |
| AZT+3TC+NVP                         | 158 (44)                  | 984 (45.7)              | 164.2        | 43.5, 47.9                 |
| AZT+3TC+EFV                         | 12 (3.3)                  | 64 (3.0)                | 10.7         | 0.8, 5.2                   |
| TDF+ 3TC+EFV                        | 107 (29.8)                | 568 (26.4)              | 94.8         | 24.2, 28.6                 |
| TDF+ 3TC+NVP                        | 43 (12)                   | 209 (9.7)               | 34.9         | 7.5, 11.9                  |
| ABC+DDI+LPV/R                       | 15 (4.2)                  | 91 (4.2)                | 15.2         | 2.0, 6.4                   |
| Others regimen                      | 11 (3.1)                  | 90 (4.2)                | 15.0         | 2.1, 6.5                   |
| Pre-HAART*                          | 13 (3.6)                  | 146 (6.8)               | 24.4         | <b>4.6, 9.0</b>            |

\*sample % doesn't fall within 95% CI range of population

**Example: Using unbiased estimate of normal sample representation by Cochran  
(1) formula;**

- **For gender: Male**
- Formula:  $V(np) = nP(1-P)(1 - f)$
- Where  $n$  = sample size = 359
- $P$  = actual proportion =  $782/2152$
- $nP$  = sample count = 125
- = multiplication
- $1 - f$  % of observations not in the sample =  $[1793/(2102 - 1)]$
- $V(np) = 359*(782/2152)*(1793/2151) = 68.6$
- **$E(np)$  is an unbiased estimator of  $(757/2102)*359 = 130.5$**
- **Our male sample was  $n= 125$  male which approximates 130**

**Percentages of variable were nearly similar for both sample and population,  
And unbiased estimator showed close proximity as well, suggesting that the  
sample was representative of the clinical population.**

### **Reference**

1. Cochran WG. Sampling Techniques: 3d Ed. Wiley New York; 1977.

### **Using the Margin of Error method (95% CI)**

To know whether our sample is representative of the population, Frequency and percentage of categorical variables were run. To figure out the margin of error, we divide 1 by the square root of (Population N) 2152 and multiply by 100.

Square root of 2152 = 46.39

1/Square root of 2152 = 0.02155

$0.022 \times 100 = 2.16\%$ . This means that there should be a 95% chance that our population parameter is within 2.16% of our statistics.

#### **Example:**

**Gender: n 359**

**Male: [n = 125], [N 782]**

**$36.3\% - 2.16 = 34.2$**

**$36.5\% + 2.16 = 38.5$  [95% CI Range 34.2, 38.5]**

**Sample parameter of Male % is 34.8 which is within the range. So, male sample represent our clinical population.**
